# Supplementary material for: Association of Rare Copy Number Variants With Risk of Depression
Source: PubMed Central journal article supplement (PMC6583866; doi:10.1001/jamapsychiatry.2019.0566), 2019-04-17
Supplement: jamapsychiatry-76-818-s001.pdf [file jamapsychiatry-76-818-s001.pdf]

## Supplementary Online Content

Kendall KM, Rees E, Bracher-Smith M, et al. Association of rare copy number variants with risk of depression. *JAMA Psychiatry*. Published online April 17, 2019. doi:10.1001/jamapsychiatry.2019.0566

**eTable 1.** Association Analyses of Individual Neurodevelopmental CNVs With Self-Reported Depression

**eTable 2.** Analyses of Depression Sub-phenotypes for Individuals Who Stated They Had Ever Experienced Prolonged Feelings of Sadness or Depression

**eTable 3.** Direct and Indirect Effect Results of Potential Explanatory Variables for the Neurodevelopmental CNV-Depression Association

**eTable 4.** The Rates of Depression in Females and Males in (i) the Whole Sample, (ii) Carriers of Neurodevelopmental CNVs

**eTable 5.** Association Analyses of Neurodevelopmental With the Three Depression Phenotypes According to Sex

**eTable 6.** Commands and Parameters Used for the Processing of Genotype Data With Affymetrix Power Tools and PennCNV-Affy

**eTable 7.** Examples of the Plink Code Used

**eTable 8.** Examples of the R Code Used

**eTable 9.** Criteria Used for Calling CNVs

**eTable 10.** A Comparison of the Phenotypic Definitions Used in This Study and the Results of Association Analyses With Neurodevelopmental CNVs

**eTable 11.** CNV Coordinates

This supplementary material has been provided by the authors to give readers additional information about their work.

| CNV                  | N        | OR<br>(95% CI)       | p                         | CNV                   | N   | OR<br>(95% CI)      | p                         |
|----------------------|----------|----------------------|---------------------------|-----------------------|-----|---------------------|---------------------------|
| TAR del              | 70       | 0.95 (0.29 – 2.29)   | 0.92                      | 15q24 dup             | 8   | 1.89 (0.10 – 10.74) | 0.55                      |
| TAR dup              | 405      | 1.17 (0.77 – 1.69)   | 0.44                      | 16p13.11 del          | 126 | 2.21 (1.25 – 3.63)  | 0.003                     |
| 1q21.1 del           | 104      | 1.11 (0.46 – 2.22)   | 0.79                      | 16p13.11 dup          | 791 | 0.87 (0.63 – 1.78)  | 0.39                      |
| 1q21.1 dup           | 173      | 2.17 (1.34 – 3.36)   | 9.08 x 10 <sup>-4</sup> * | 16p12.1 del           | 236 | 1.47 (0.90 – 2.27)  | 0.09                      |
| NRXN1 del            | 160      | 2.01 (1.18 – 3.19)   | 0.0057                    | 16p11.2 distal del    | 57  | 2.23 (0.92 – 4.63)  | 0.05                      |
| 2q11.2 del           | 31       | 2.34 (0.69 – 6.02)   | 0.11                      | 16p11.2 distal<br>dup | 131 | 1.57 (0.82 – 2.73)  | 0.14                      |
| 2q13 del             | 51       | 0.98 (0.24 – 2.67)   | 0.97                      | 16p11.2 del           | 110 | 1.21 (0.54 – 2.34)  | 0.60                      |
| 2q13 dup             | 68       | 1.29 (0.49 – 2.9)    | 0.59                      | 16p11.2 dup           | 124 | 2.65 (1.53 – 4.31)  | 2.04 x 10 <sup>-4</sup> * |
| 3q29 del             | 8        | 11.22 (2.27 – 46.52) | 0.001                     | PL syndrome dup       | 5   | 4.31 (0.22 – 29.82) | 0.19                      |
| 8p23.1 dup           | 6        | 9.64 (1.32 – 50.21)  | 0.009                     | 17q11.2 del           | 9   | 2.16 (0.12 – 11.86) | 0.47                      |
| 15q11.2 del          | 157<br>8 | 1.11 (0.90 – 1.35)   | 0.30                      | 17q12 dup             | 95  | 1.55 (0.69 – 3.02)  | 0.23                      |
| Prader Willi syn dup | 17       | 8.14 (2.77 – 21.69)  | 4.61 x 10 <sup>-5</sup> * | 22q11.2 del           | 10  | 1.69 (0.09 – 9.17)  | 0.62                      |
| 15q13.3 del          | 43       | 0.77 (0.13 – 2.52)   | 0.72                      | 22q11.2 dup           | 267 | 1.72 (1.12 – 2.53)  | 0.009                     |

**eTable 1.** Association Analyses of Individual Neurodevelopmental CNVs With Self-Reported Depression

Analyses were restricted to those of genetic European ancestry and individuals with CNV-associated neurodevelopmental/neuropsychiatric disorders were excluded. Logistic regression analyses included age, sex, genotyping array and the first 15 principal components as covariates. N – number of CNV carriers (affected and unaffected combined), OR – odds ratio, 95% CI – 95% confidence interval, p – uncorrected p value. Results, which survived Bonferroni correction for 53 tests are marked with \*. Some CNVs were not analysed because they (i) were not observed 1p36 dup, Wolf-Hirschhorn del, Wolf-Hirschhorn dup, Soto syndrome del, 9q34 dup (*EHMT1*), Potocki-Shaffer del, 15q24 del, 17p13.3 del (*YWHAE*), 17p13.3 dup (*YWHAE*), 17p13.3 del (*PAFAH1B1*), 17p13.3 dup (*PAFAH1B1*), 17q21.31 del, *SHANK3* del, *SHANK3* dup) (ii) had counts < 5 (1p36 del, 2q37 del, Williams Beuren del, 8p23.1 del, 10q23 del, Prader Willi syn del, 15q25 del, Smith Magenis syn del, 17q11.2 dup (*NF1*), 22q11.2 distal del), or (iii) no carriers had depression (Williams Beuren dup, 17q12 del, 22q11.2 distal del).

| Variable                                                                                           | CNV Class               | Effect Size (95% CI)    | p     |
|----------------------------------------------------------------------------------------------------|-------------------------|-------------------------|-------|
| 20446 Ever had prolonged feelings of sadness or depression<br>(68,684 affected, 57,243 unaffected) | Neurodevelopmental CNVs | 1.20 (1.07 – 1.36)      | 0.002 |
|                                                                                                    | 100KB + <1%             | 0.99 (0.98 – 1.02)      | 0.96  |
|                                                                                                    | 500KB+ <1%              | 0.99 (0.95 – 1.03)      | 0.65  |
|                                                                                                    | 1MB + <1%               | 0.96 (0.90 – 1.02)      | 0.25  |
| 20433 Age at first episode of depression<br>(n =65,106)                                            | Neurodevelopmental CNVs | -0.07 (-0.15 - -0.002)  | 0.06  |
|                                                                                                    | 100KB + <1%             | -0.001 (-0.016 – 0.014) | 0.86  |
|                                                                                                    | 500KB + <1%             | 0.002 (-0.027 – 0.030)  | 0.91  |
|                                                                                                    | 1MB + <1%               | -0.005 (-0.047 – 0.037) | 0.82  |
| 20438 Duration of worst depression (0-3 months vs > 3 months)<br>(n =69,971)                       | Neurodevelopmental CNVs | 0.98 (0.84 – 1.14)      | 0.74  |
|                                                                                                    | 100KB + <1%             | 0.99 (0.97 – 1.03)      | 0.78  |
|                                                                                                    | 500KB + <1%             | 0.99 (0.94 – 1.05)      | 0.82  |
|                                                                                                    | 1MB + <1%               | 1.07 (0.98 – 1.17)      | 0.10  |
| 20442 Lifetime number of depressed episodes (1 vs 2+)<br>(n =57,482)                               | Neurodevelopmental CNVs | 1.04 (0.87 – 1.24)      | 0.68  |
|                                                                                                    | 100KB + <1%             | 1.00 (0.97 – 1.04)      | 0.86  |
|                                                                                                    | 500KB + <1%             | 1.02 (0.96 – 1.09)      | 0.51  |
|                                                                                                    | 1MB + <1%               | 1.13 (1.03 – 1.25)      | 0.009 |

**eTable 2.** Analyses of Depression Sub-phenotypes for Individuals Who Stated They Had Ever Experienced Prolonged Feelings of Sadness or Depression (UKBB field 20446)

Analyses used logistic regression with age, sex, genotyping array and the first 15 principal components as covariates except that for age at first episode of depression (UKBB field 20433), which used linear regression (same covariates). Analyses were restricted to those of genetic European ancestry, and individuals with CNV-associated neurodevelopmental/neuropsychiatric disorders were excluded from being cases and controls. Effect size – odds ratio (except for age at first episode of depression – standardised Beta), 95% CI – 95% confidence interval, p – uncorrected p value.

| <b>Indirect Effects</b>        | Proportion Explained | Estimate | Standard Error        | p           |
|--------------------------------|----------------------|----------|-----------------------|-------------|
| <b>Explanatory Variable</b>    |                      |          |                       |             |
| Educational attainment         | 1.2%                 | 0.00023  | $7.78 \times 10^{-5}$ | 0.0032      |
| Physical health                | 2.9%                 | 0.00053  | $1.85 \times 10^{-4}$ | 0.0045      |
| Social deprivation             | 8.1%                 | 0.0015   | $1.59 \times 10^{-4}$ | < 0.0001    |
| Smoking                        | 4.8%                 | 0.00088  | $1.58 \times 10^{-4}$ | 0.000000029 |
| Alcohol consumption            | 16.6%                | 0.0031   | $2.39 \times 10^{-4}$ | < 0.0001    |
| <b>Sum of Indirect Effects</b> | 21.5%                | 0.0039   | $3.85 \times 10^{-4}$ | < 0.0001    |
| <b>Direct Effect</b>           |                      |          |                       |             |
| Neurodevelopmental CNVs        |                      | 0.018    | 0.0038                | 0.0000025   |

**eTable 3.** Direct and Indirect Effect Results of Potential Explanatory Variables for the Neurodevelopmental CNV-Depression Association

Direct and indirect effect results of analyses aiming to examine whether the association between neurodevelopmental CNVs and depression could be explained by educational attainment, physical health, social deprivation, smoking status or alcohol consumption. All results were generated using structural equation modelling in Lavaan. The proportion explained was estimated by indirect effect/total effect. SE – standard error, p – uncorrected p value.

|                    | Females               | Males                | Chi square | p                         |
|--------------------|-----------------------|----------------------|------------|---------------------------|
| Whole Sample       |                       |                      |            |                           |
| Rate of depression | 7.16%<br>(n = 15,761) | 4.39%<br>(n = 8,218) | 1388.97    | 3.37 x 10 <sup>-304</sup> |
| CNV Carriers Only  |                       |                      |            |                           |
| Rate of depression | 10.24%<br>(n = 246)   | 5.02%<br>(n = 117)   | 45.45      | 1.22 x 10 <sup>-11</sup>  |

**eTable 4.** The Rates of Depression in Females and Males in (i) the Whole Sample, (ii) Carriers of Neurodevelopmental CNVs  
Analyses were restricted to those of genetic European ancestry, and individuals with CNV-associated neurodevelopmental/neuropsychiatric disorders were excluded from being cases and controls. CNV carriers are included in the ‘whole sample’ section of the table. p – p value.

| CNV Type                                                         | Self-Reported Depression              |                         | Self-Reported Depression and Antidepressant Prescription on Visit 1 |                         | Hospital Discharge Diagnosis of Depression |                         |
|------------------------------------------------------------------|---------------------------------------|-------------------------|---------------------------------------------------------------------|-------------------------|--------------------------------------------|-------------------------|
|                                                                  | 23,979 affected<br>383,095 unaffected |                         | 15,339 affected,<br>370,876 unaffected                              |                         | 11,169 affected<br>284,179 unaffected      |                         |
|                                                                  | OR (95% CI)                           | p                       | OR (95% CI)                                                         | p                       | OR (95% CI)                                | p                       |
| Neurodevelopmental CNVs                                          |                                       |                         |                                                                     |                         |                                            |                         |
| All (females and males)                                          | 1.34<br>(1.19 – 1.49)                 | 1.38 x 10 <sup>-7</sup> | 1.42<br>(1.25 – 1.62)                                               | 1.18 x 10 <sup>-7</sup> | 1.51<br>(1.30 – 1.75)                      | 2.95 x 10 <sup>-8</sup> |
| Females                                                          | 1.46<br>(1.28 – 1.67)                 | 2.23 x 10 <sup>-8</sup> | 1.51<br>(1.29 – 1.78)                                               | 3.75 x 10 <sup>-7</sup> | 1.67<br>(1.39 – 2.01)                      | 2.66 x 10 <sup>-8</sup> |
| Males                                                            | 1.14<br>(0.95 – 1.38)                 | 0.17                    | 1.27<br>(1.01 – 1.59)                                               | 0.041                   | 1.28<br>(0.99 – 1.63)                      | 0.052                   |
| Interaction term<br>(product of neurodevelopmental CNVs and sex) | 0.66<br>(0.53 – 0.83)                 | 0.0002                  | 0.67<br>(0.51 – 0.87)                                               | 0.003                   | 0.67<br>(0.49 – 0.91)                      | 0.009                   |

**eTable 5.** Association Analyses of Neurodevelopmental With the Three Depression Phenotypes According to Sex

Analyses were restricted to those of European genetic ancestry and excluded individuals with CNV-associated neurodevelopmental/neuropsychiatric disorders. OR – odds ratio, 95% CI – 95% confidence interval, p – uncorrected p value.



| Command                               | Parameters                                                                                                                                                                                                                |
|---------------------------------------|---------------------------------------------------------------------------------------------------------------------------------------------------------------------------------------------------------------------------|
| <i>apt-probeset-genotype</i>          | /apt-probeset-genotype --analysis-files-path /Axiom UKB WCSG.r3/ --xml-file /Axiom UKB WCSG 96orMore Step2 Bi-allelic.r3.apt-probeset-genotype.AxiomGT1.xml --out-dir /Batch1 --summaries --cel-files cel.list batch1.txt |
| <i>generate affy geno cluster.pl</i>  | /generate affy geno cluster.pl AxiomGT1.calls.txt AxiomGT1.confidences.txt AxiomGT1.summary.txt --nopower2 -locfile mapfile.dat -sexfile sex batch1.txt -out batch1.genocluster                                           |
| <i>normalize affy geno cluster.pl</i> | normalize affy geno cluster.pl batch1.genocluster AxiomGT1.summary.txt -nopower2 -locfile mapfileAX.dat -out batch1 lrr baf.txt                                                                                           |
| <i>kcolumn.pl</i>                     | kcolumn.pl batch1 lrr baf.txt split 2 -start 1 -end 1000 -tab -head 3 -name                                                                                                                                               |
| <i>ls</i>                             | ls split1*>Batch1 signalfilelist                                                                                                                                                                                          |
| <i>compile pfb.pl</i>                 | compile pfb.pl -listfile Batch10 500signalfilelist.txt -output                                                                                                                                                            |
| <i>detect cnv.pl</i>                  | detect cnv.pl -test -hmm Axiom trained.hmm -pfb Axiom.pfb -listfile Batch1 signalfilelist -out --confidence --log -gcmmodel Axiom.gcmmodel                                                                                |
| <i>clean cnv.pl</i>                   | clean cnv.pl combineseg Batch1.rawcnv > join batch1.rawcnv -signalfile Axiom.pfb -fraction 0.25 -bp                                                                                                                       |

**Table 6.** Commands and Parameters Used for the Processing of Genotype Data With Affymetrix Power Tools and PennCNV-Affy (given arbitrarily for batch 1)

| CNV Type                                        | Code                                                                                                                                                                                                                                 |
|-------------------------------------------------|--------------------------------------------------------------------------------------------------------------------------------------------------------------------------------------------------------------------------------------|
| Rare CNVs 500kb<br>(deletions and duplications) | <code>./plink --cnv-list burden.txt --map burden.map -<br/>-fam srd.ped.txt --cnv-kb 500 --cnv-freq-<br/>exclude-above 4070 --cnv-exclude<br/>exclregions.txt --cnv-overlap 0.5 --cnv-indiv-<br/>perm --mperm 10000</code>           |
| Rare CNVs 500kb<br>(deletions)                  | <code>./plink --cnv-list burden.txt --map burden.map -<br/>-fam srd.ped.txt --cnv-kb 500 --cnv-del --cnv-<br/>freq-exclude-above 4070 --cnv-exclude<br/>exclregions.txt --cnv-overlap 0.5 --cnv-indiv-<br/>perm --mperm 10000</code> |
| Rare CNVs 500kb<br>(deletions)                  | <code>./plink --cnv-list burden.txt --map burden.map -<br/>-fam srd.ped.txt --cnv-kb 500 --cnv-dup --cnv-<br/>freq-exclude-above 4070 --cnv-exclude<br/>exclregions.txt --cnv-overlap 0.5 --cnv-indiv-<br/>perm --mperm 10000</code> |

**eTable 7.** Examples of the Plink Code Used

(given arbitrarily for 500kb CNVs and the self-reported depression phenotype)

|                                                      | Code                                                                                                                                                                                                                                                                                                                                                                                      |
|------------------------------------------------------|-------------------------------------------------------------------------------------------------------------------------------------------------------------------------------------------------------------------------------------------------------------------------------------------------------------------------------------------------------------------------------------------|
| Logistic regression model                            | <pre>model &lt;- glm(srd ~ ndcnv + age + sex + array + pc1 + pc2 + pc3 + pc4 + pc5 + pc6 + pc7 + pc8 + pc9 + pc10 + pc11 + pc12 + pc13 + pc14 + pc15, family=binomial(link='logit'), data=depression)</pre>                                                                                                                                                                               |
| Generate odds ratio                                  | <pre>exp(coefficients(model))</pre>                                                                                                                                                                                                                                                                                                                                                       |
| Generate 95% confidence intervals for the odds ratio | <pre>exp(cbind(OR= coef(model), confint(model)))</pre>                                                                                                                                                                                                                                                                                                                                    |
| Lavaan model                                         | <pre>model &lt;- '#outcome model dep ~ c*ndcnv + b1*degree + b2*tdi + b3*dx + b4*alcohol + b5*smoking  #mediator models degree ~ a1*ndcnv tdi ~ a2*ndcnv dx ~ a3*ndcnv alcohol ~ a4*ndcnv smoking ~ a5*ndcnv  #indirect effects degreeIDE := a1*b1 tdiIDE := a2*b2 dxIDE := a3*b3 alcoholIDE := a4*b4 smokingIDE := a5*b5 sumIDE := (a1*b1) + (a2*b2) + (a3*b3) + (a4*b4) + (a5*b5)</pre> |

|                     |                                                                                        |
|---------------------|----------------------------------------------------------------------------------------|
|                     | <pre>#total effect total := c + (a1*b1) + (a2*b2) + (a3*b3) + (a4*b4) + (a5*b5)'</pre> |
| Model fitting       | <pre>fit &lt;- sem(model, data=mediation)</pre>                                        |
| Parameter estimates | <pre>boot.fit &lt;- parameterEstimates(fit, boot.ci.type = "bca.simple")</pre>         |

**eTable 8.** Examples of the R Code Used

Lavaan code requires the installation of the Lavaan package.

| <b>CNV</b>                                          | <b>Criteria</b>                                                              |
|-----------------------------------------------------|------------------------------------------------------------------------------|
| 1p36 del/dup                                        | Size >50% of critical region, affecting <i>GABRD</i>                         |
| TAR del/dup                                         | Size >50% of critical region                                                 |
| 1q21.1 del/dup                                      | Size >50% of critical region                                                 |
| <i>NRXN1 del</i>                                    | Exonic deletions                                                             |
| 2q11.2 del/dup                                      | Size >50% of critical region, affecting both <i>LMAN2L</i> and <i>ARID5A</i> |
| 2q13 del/dup                                        | Size >50% of critical region                                                 |
| 2q13 del/dup ( <i>NPHP1</i> )                       | Size >50% of critical region, affecting <i>NPHP1</i>                         |
| 2q21.1 del/dup                                      | Size >50% of critical region                                                 |
| 2q37 del/dup ( <i>HDAC4</i> )                       | Size >50% of critical region, affecting <i>HDAC4</i>                         |
| 3q29 del/dup                                        | Size >50% of critical region                                                 |
| Wolf-Hirschhorn del/dup                             | Size >50% of critical region                                                 |
| Sotos Syn/5q35 dup                                  | Size >50% of critical region                                                 |
| 6q16 del/dup ( <i>SIM1</i> )                        | Exonic deletions; whole gene duplications                                    |
| Williams Beuren Syn del/dup                         | Size >50% of critical region                                                 |
| 7q11.23 distal del/distal dup                       | Size >50% of critical region                                                 |
| 8p23.1 del/dup                                      | At least 1Mbp of critical region                                             |
| 9q34 del/dup ( <i>EHMT1</i> )                       | At least 1Mbp CNVs, including <i>EHMT1</i>                                   |
| 10q11.21q11.23 del/dup                              | Size >50% of critical region                                                 |
| 10q23 del/dup                                       | At least 1Mbp, including <i>NRG3</i> and <i>GRID1</i>                        |
| Potocki-Shaffer Syn del/11p11.2 dup ( <i>EXT2</i> ) | Size >50% of critical region, including <i>EXT2</i>                          |
| 13q12 del/dup ( <i>CRYL1</i> )                      | Exonic deletions; whole gene duplications                                    |
| 13q12.12 del/dup                                    | Size >50% of critical region                                                 |
| 15q11.2 del/dup                                     | Size >50% of critical region                                                 |
| PWS del/dup                                         | Full critical region, ~4Mbp                                                  |
| 15q11q13 del/dup BP3-BP4                            | Size >50% of critical region                                                 |
| 15q11q13 del/dup BP3-BP5                            | Size >50% of critical region                                                 |
| 15q13.3 del/dup                                     | Size >50% of critical region                                                 |

|                                            |                                                       |
|--------------------------------------------|-------------------------------------------------------|
| 15q13.3 del/dup ( <i>CHRNA7</i> )          | Size >50% of critical region, affecting <i>CHRNA7</i> |
| 15q24 del/dup                              | At least 1Mbp between the A-E intervals               |
| 15q25 del/dup                              | At least 1Mbp between the A-D intervals               |
| Rubinstein-Taybi del/dup ( <i>CREBBP</i> ) | Exonic deletions; whole gene duplications             |
| 16p13.11 del/dup                           | Size >50% of critical region                          |
| 16p12.1 del/dup                            | Size >50% of critical region                          |
| 16p12.2-p11.2 del/dup (7.1-8.7 Mb)         | Size >50% of critical region                          |
| 16p11.2 distal del/distal dup              | Size >50% of critical region                          |
| 16p11.2 del/dup                            | Size >50% of critical region                          |
| 17p13.3 del/dup ( <i>YWHAE</i> )           | Exonic deletions; whole gene duplications             |
| 17p13.3 del/dup ( <i>PAFAH1B1</i> )        | Exonic deletions; whole gene duplications             |
| 17p12 del (HNPP)/dup (CMT1A)               | Size >50% of critical region, affecting <i>PMP22</i>  |
| Smith-Magenis/Potocki-Lupski Syndrome      | Size >50% of critical region                          |
| 17q11.2 del/dup ( <i>NF1</i> )             | Size >50% of critical region, affecting <i>NF1</i>    |
| 17q12 del/dup                              | Size >50% of critical region                          |
| 17q21.31 del/dup                           | Size >50% of critical region                          |
| 17q23.1q23.2 del/dup                       | Size >50% of critical region                          |
| 22q11.2 del/dup                            | Size >50% of critical region                          |
| 22q11.2 distal del/dup                     | Size >50% of critical region                          |
| <i>SHANK3</i> del/dup                      | At least 1Mbp CNVs, including <i>SHANK3</i>           |

**eTable 9.** Criteria Used for Calling CNVs

| Phenotype                                                           | Criteria                                                                                                                                                                                                                                                                                                                                                                                                                                                                                                                                           | OR (95% CI)           | p                       |
|---------------------------------------------------------------------|----------------------------------------------------------------------------------------------------------------------------------------------------------------------------------------------------------------------------------------------------------------------------------------------------------------------------------------------------------------------------------------------------------------------------------------------------------------------------------------------------------------------------------------------------|-----------------------|-------------------------|
| Self-reported depression (assessment centre)                        | Self-report of a doctor diagnosis of depression – code 1286 in field 20002.<br>Exclusions – BPAD, SCZ, ASD, ID, ADHD.                                                                                                                                                                                                                                                                                                                                                                                                                              | 1.34<br>(1.19 – 1.49) | 1.38 x 10 <sup>-7</sup> |
| Self-reported depression and antidepressant prescription at visit 1 | Self-report of a doctor diagnosis of depression – code 1286 in field 20002 and antidepressant prescription at the time of assessment (field 20003).<br>Exclusions - BPAD, SCZ, ASD, ID, ADHD, individuals fulfilling one criterion (i.e. depression alone or antidepressant prescription alone).                                                                                                                                                                                                                                                   | 1.42<br>(1.25 – 1.62) | 1.18 x 10 <sup>-7</sup> |
| Hospital discharge diagnosis of depression                          | Hospital admission with a primary or secondary ICD-10 code for depression (fields 41202 and 41204).<br>Exclusions – BPAD, SCZ, ASD, ID, ADHD.                                                                                                                                                                                                                                                                                                                                                                                                      | 1.51<br>(1.30 – 1.75) | 2.95 x 10 <sup>-8</sup> |
| Self-reported depression diagnosis (MHQ) <sup>1</sup>               | Self-report of a depression diagnosis from a health professional.<br>Exclusions – none.                                                                                                                                                                                                                                                                                                                                                                                                                                                            | 1.29<br>(1.03 – 1.62) | 0.025                   |
| Constructed CIDI depression variable (MHQ) <sup>1</sup>             | Persistent sadness 20446 <b>or</b> loss of interest field 20441 <b>and</b> ,<br>most of day or all day long 20436 <b>and</b> ,<br>felt this way almost every day or every day 20439 <b>and</b> ,<br>somewhat impaired or a lot of impairment 20440 <b>and</b> ,<br>total number of symptoms ≥ 5 - persistent sadness 20446, loss of interest 20441,<br>tired/low energy 20449, gain/loss/gain and loss of weight 20536, sleep change 20532, trouble concentrating 20435, feeling worthless 20450, thinking about death 20437<br>Exclusions – none. | 1.13<br>(0.99 – 1.29) | 0.064                   |

**eTable 10.** A Comparison of the Phenotypic Definitions Used in This Study and the Results of Association Analyses With Neurodevelopmental CNVs

BPAD – bipolar affective disorder, SCZ – schizophrenia, ASD – autism spectrum disorder, ID – intellectual disability, ADHD – attention deficit hyperactivity disorder, OR – odds ratio, 95% CI – 95% confidence interval, p – uncorrected p value.



| <b>Syndrome</b>                      | <b>Locus</b> | <b>Critical/Unique Sequence Region (hg19)</b> | <b>Coe_significant</b> | <b>Sz-CNV</b> |
|--------------------------------------|--------------|-----------------------------------------------|------------------------|---------------|
| 1p36 del ( <i>GABRD</i> )            | 1p36         | chr1:0-2500000                                | 1                      |               |
| 1p36 dup ( <i>GABRD</i> )            | 1p36         | chr1:0-2500000                                | 1                      |               |
| TAR del                              | 1q21.1       | chr1:145,394,955-145,807,817                  | 1                      |               |
| TAR dup                              | 1q21.1       | chr1:145,394,955-145,807,817                  | 1                      |               |
| 1q21.1 del                           | 1q21.1       | chr1:146,527,987-147,394,444                  | 1                      | 1             |
| 1q21.1 dup                           | 1q21.1       | chr1:146,527,987-147,394,444                  | 1                      | 1             |
| <i>NRXN1</i> del                     | 2p16.3       | chr2:50145643-51259674                        | 1                      | 1             |
| 2q11.2 del ( <i>LMAN2L, ARID5A</i> ) | 2q11.2       | chr2:96,742,409-97,677,516                    | 1                      |               |
| 2q13 del                             | 2q13         | chr2:111,394,040-112,012,649                  | 1                      |               |
| 2q13 dup                             | 2q13         | chr2:111,394,040-112,012,649                  | 1                      |               |
| 2q37 del ( <i>HDAC4</i> )            | 2q37         | chr2:239,716,679-243,199,373                  | 1                      |               |
| 3q29 del                             | 3q29         | chr3:195,720,167-197,354,826                  | 1                      | 1             |
| Wolf-Hirschhorn del                  | 4p16.3       | chr4:1,552,030-2,091,303                      | 1                      |               |
| Wolf-Hirschhorn dup                  | 4p16.3       | chr4:1,552,030-2,091,303                      | 1                      |               |
| Sotos syndrome del                   | 5q35         | chr5:175,720,924-177,052,594                  | 1                      |               |
| Williams-Beuren syndrome (WBS) del   | 7q11.23      | chr7:72,744,915-74,142,892                    | 1                      |               |
| WBS dup                              | 7q11.23      | chr7:72,744,915-74,142,892                    | 1                      | 1             |

|                                                      |            |                              |   |   |
|------------------------------------------------------|------------|------------------------------|---|---|
| 8p23.1 del                                           | 8p23.1     | chr8:8,098,990-11,872,558    | 1 |   |
| 8p23.1 dup                                           | 8p23.1     | chr8:8,098,990-11,872,558    | 1 |   |
| 9q34 dup ( <i>EHMT1</i> )                            | 9q34       | chr9:140,513,444-140,730,578 | 1 |   |
| 10q23 del ( <i>NRG3, GRID1</i> )                     | 10q22q23   | chr10:82,045,472-88,931,651  | 1 |   |
| Potocki-Shaffer syndrome del ( <i>EXT2</i> )         | 11p11.2    | chr11:43,940,000-46,020,000  | 1 |   |
| 15q11.2 del BP1-BP2                                  | 15q11.2    | chr15:22,805,313-23,094,530  | 1 | 1 |
| 15q11.2 dup BP1-BP2                                  | 15q11.2    | chr15:22,805,313-23,094,530  | 1 |   |
| Prader-Willi syndrome/Angelman syndrome (PWS/AS) del | 15q11.2q12 | chr15:22,805,313-28390339    | 1 |   |
| PWS/AS dup                                           | 15q11.2q12 | chr15:22,805,313-28390339    | 1 | 1 |
| 15q13.3 del BP4-BP5                                  | 15q13.3    | chr15:31,080,645-32,462,776  | 1 | 1 |
| 15q24 del                                            | 15q24      | chr15:72900171-78151253      | 1 |   |
| 15q24 dup                                            | 15q24      | chr15:72900171-78151253      | 1 |   |
| 15q25 del                                            | 15q25.2    | chr15:83,219,735-85,722,039  | 1 |   |
| 16p13.11 del                                         | 16p13.11   | chr16:15,511,655-16,293,689  | 1 |   |
| 16p13.11 dup                                         | 16p13.11   | chr16:15,511,655-16,293,689  | 1 | 1 |
| 16p12.1 del (520kb)                                  | 16p12.1    | chr16:21,950,135-22,431,889  | 1 | 1 |
| 16p11.2 distal del (220kb)                           | 16p11.2    | chr16:28,823,196-29,046,783  | 1 |   |
| 16p11.2 distal dup (220kb)                           | 16p11.2    | chr16:28,823,196-29,046,783  | 1 |   |
| 16p11.2 del (593kb)                                  | 16p11.2    | chr16:29,650,840-30,200,773  | 1 |   |

|                                              |          |                             |   |   |
|----------------------------------------------|----------|-----------------------------|---|---|
| 16p11.2 dup (593kb)                          | 16p11.2  | chr16:29,650,840-30,200,773 | 1 | 1 |
| 17p13.3 del ( <i>YWHAE</i> )                 | 17p13.3  | chr17:1,247,834-1,303,556   | 1 |   |
| 17p13.3 dup ( <i>YWHAE</i> )                 | 17p13.3  | chr17:1,247,834-1,303,556   | 1 |   |
| 17p13.3 del ( <i>PAFAH1B1</i> )              | 17p13.3  | chr17:2,496,923-2,588,909   | 1 |   |
| 17p13.3 dup ( <i>PAFAH1B1</i> )              | 17p13.3  | chr17:2,496,923-2,588,909   | 1 |   |
| Smith-Magenis syndrome del                   | 17p11.2  | chr17:16,812,771-20,211,017 | 1 |   |
| Potocki-Lupski syndrome dup                  | 17p11.2  | chr17:16,812,771-20,211,017 | 1 |   |
| 17q11.2 del ( <i>NF1</i> )                   | 17q11.2  | chr17:29,107,491-30,265,075 | 1 |   |
| 17q11.2 dup ( <i>NF1</i> )                   | 17q11.2  | chr17:29,107,491-30,265,075 | 1 |   |
| Renal cysts and diabetes syndrome del (RCAD) | 17q12    | chr17:34,815,904-36,217,432 | 1 |   |
| 17q12 dup                                    | 17q12    | chr17:34,815,904-36,217,432 | 1 |   |
| 17q21.31 del                                 | 17q21.31 | chr17:43,705,356-44,164,691 | 1 |   |
| 22q11.2 del                                  | 22q11.2  | chr22:19,037,332-21,466,726 | 1 | 1 |
| 22q11.2 dup                                  | 22q11.2  | chr22:19,037,332-21,466,726 | 1 |   |
| 22q11.2 distal del                           | 22q11.2  | chr22:21,920,127-23,653,646 | 1 |   |
| 22q11.2 distal dup                           | 22q11.2  | chr22:21,920,127-23,653,646 | 1 |   |
| <i>SHANK3</i> del                            | 22q13    | chr22:51113070-51171640     | 1 |   |
| <i>SHANK3</i> dup                            | 22q13    | chr22:51113070-51171640     | 1 |   |

**eTable 11.** CNV Coordinates
